# Supplementary material
Source: PubMed Central journal article supplement (PMC4561190)
Supplement: NIHMS709873-supplement-1.pdf [file NIHMS709873-supplement-1.pdf]

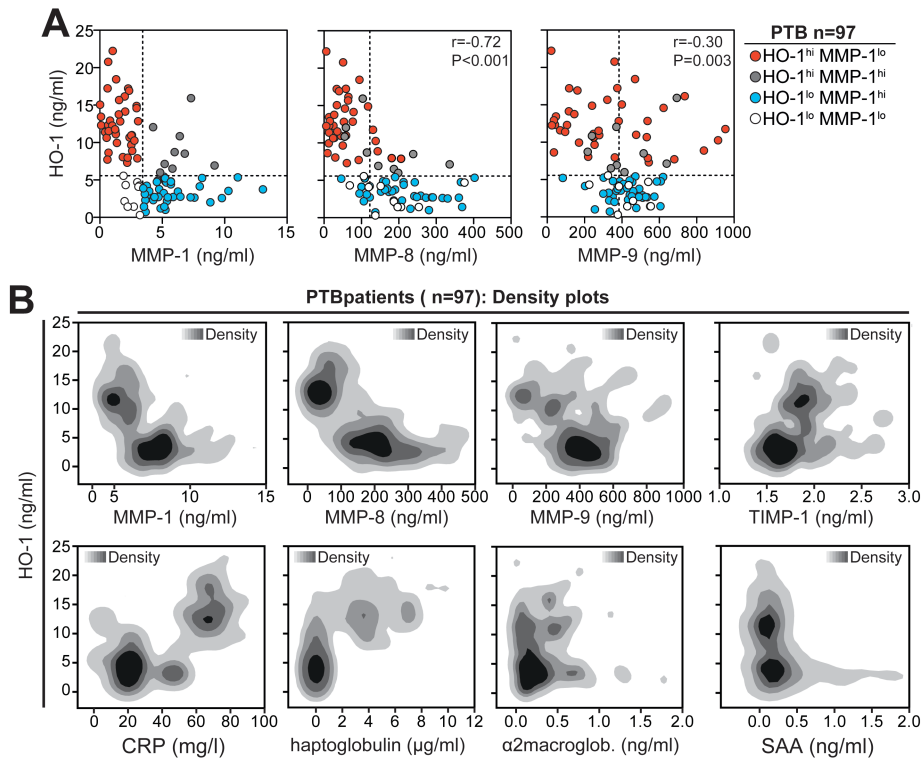

**Supplemental Figure 1. Dichotomous expression of HO-1 and markers of inflammation and tissue remodeling in plasma from active TB patients**

(A) Values from individuals with active TB from India (n=97) were colored according to the expression profile of HO-1 and MMP-1 in plasma samples. The individuals were then marked in Spearman correlation graphs between HO-1 and MMP-8 or MMP-9 to test if they would also exhibit similar patterns of expression. (B) Density plots of the correlations between HO-1 and other biomarkers of inflammation and tissue damage are shown to illustrate the different patterns of expression between these markers in PTB patients shown in (A). Darker areas in the plots represent higher number of individuals.

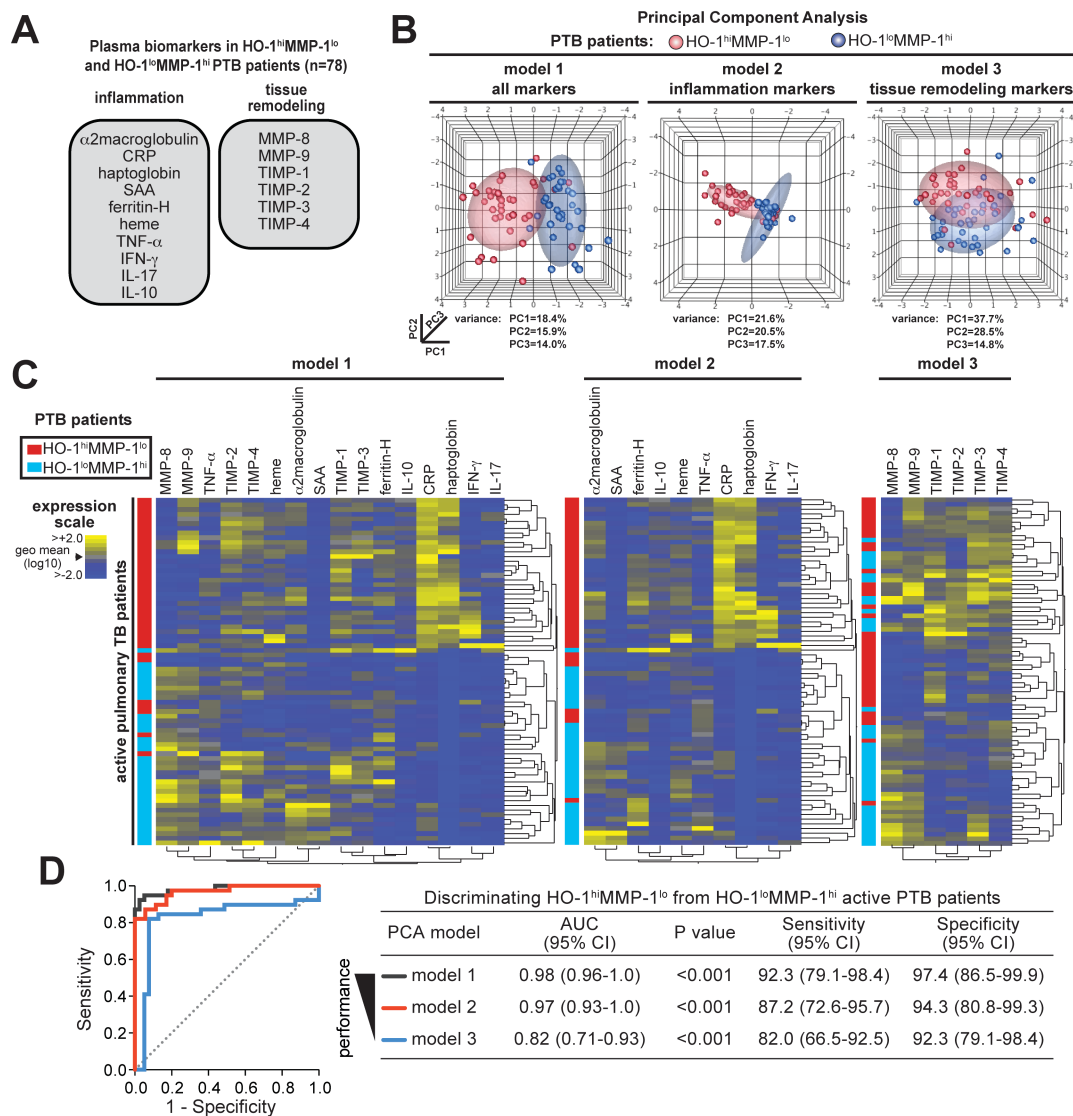

**Supplemental Figure 2. HO-1<sup>hi</sup>MMP-1<sup>lo</sup> and HO-1<sup>lo</sup>MMP-1<sup>hi</sup> TB patients can be better distinguished by their plasma protein expression profile of inflammatory biomarkers than by tissue remodeling markers.**

(A) List of the plasma biomarkers of inflammation or tissue remodeling measured in Indian patients with active PTB patients exhibiting either HO-1<sup>hi</sup>MMP-1<sup>lo</sup> (n=39) or HO-1<sup>lo</sup>MMP-1<sup>hi</sup> (n=39) expression profile (See Supplemental Table 1 for details). (B) Principal component analyses including different combinations of plasma biomarkers was employed to assess the contribution of each combination to distinguish HO-1<sup>hi</sup>MMP-1<sup>lo</sup> from HO-1<sup>lo</sup>MMP-1<sup>hi</sup> active PTB patients. Normal contour ellipsoids were used to show limits of each group (coverage area = 50%). The percentage of variance from the principal components (PC) shown in different three-dimensional graphs is described below each graph. (C) Unsupervised cluster analyses (Ward's method) were employed using the different combinations of markers shown in the diverse PCA models displayed in (A). PTB patients exhibiting either HO-1<sup>hi</sup>MMP-1<sup>lo</sup> or HO-1<sup>lo</sup>MMP-1<sup>hi</sup> were listed in rows and each biomarker was placed in a different column. The squares in the heat maps represent values below or above the geometric mean levels (Log10) of a given biomarker in the study population. (D) ROC curve analyses were performed to estimate in a quantitative way the performance of the different combinations of markers used in the PCA and cluster analyses in segregating HO-1<sup>hi</sup>MMP-1<sup>lo</sup> from HO-1<sup>lo</sup>MMP-1<sup>hi</sup> PTB patients.

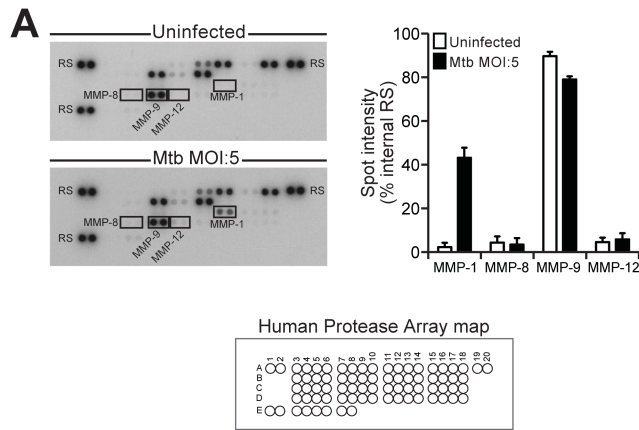

**B**

| coordinate | analyte/control      | isoform specificity | coordinate | analyte/control         | isoform specificity |
|------------|----------------------|---------------------|------------|-------------------------|---------------------|
| A1, A2     | reference spots (RS) | N/A                 | C3, C4     | Kallikrein 6            | proform & active    |
| A3, A4     | ADAM8                | ectodomain          | C5, C6     | Kallikrein 7            | proform & active    |
| A5, A6     | ADAM9                | ectodomain          | C7, C8     | Kallikrein 10           | proform & active    |
| A7, A8     | ADAMST1              | proform             | C9, C10    | Kallikrein 11           | proform & active    |
| A9, A10    | ADAMST13             | active              | C11, C12   | Kallikrein 13           | proform & active    |
| A11, A12   | Cathepsin A          | proform & active    | C13, C14   | MMP-1                   | proform & active    |
| A13, A14   | Cathepsin B          | proform             | C15, C16   | MMP-2                   | proform & active    |
| A15, A16   | Cathepsin C          | proform & active    | C17, C18   | MMP-3                   | proform & active    |
| A17, A18   | Cathepsin D          | proform & active    | D3, D4     | MMP-7                   | proform & active    |
| A19, A20   | reference spots (RS) | N/A                 | D5, D6     | MMP-8                   | proform & active    |
| B3, B4     | Cathepsin E          | proform & active    | D7, D8     | MMP-9                   | proform & active    |
| B5, B6     | Cathepsin L          | proform & active    | D9, D10    | MMP-12                  | proform & active    |
| B7, B8     | Cathepsin S          | proform & active    | D11, D12   | MMP-13                  | proform             |
| B9, B10    | Cathepsin V          | proform & active    | D13, D14   | Neprilysin/CD10         | ectodomain          |
| B11, B12   | Cathepsin X/Z/P      | proform & active    | D15, D16   | Presenilin-1            | N-terminal fragment |
| B13, B14   | DPPIV/CD26           | ectodomain          | D17, D18   | Proprotein convertase 9 | active              |
| B15, B16   | Kallikrein 3/PSA     | proform & active    | E1, E2     | reference spots (RS)    | N/A                 |
| B17, B18   | Kallikrein 5         | proform & active    | E3, E4     | Proteinase 3            | active              |
|            |                      |                     | E5, E6     | uPA/Urokinase           | proform & active    |
|            |                      |                     | E7, E8     | negative control        | N/A                 |

**Supplemental Figure 3. Expression of matrix metalloproteinases by human macrophages infected with *M. tuberculosis***

**(A)** Monocyte-differentiated macrophages were infected with H37Rv Mtb strain for 24h and expression levels of 34 proteases in culture supernatants were determined simultaneously using a human protease array kit (Human Protease Array kit, R&D Systems). Left panel shows the intensity of expression of key matrix metalloproteinases relative to the average intensity of the reference spots (RS). **(B)** The detailed map of the human protease array used in this experiment is shown. The results shown involved cells from 2 healthy control donors.

**Supplemental Table 1. Expression of plasma biomarkers in Indian patients individuals with active pulmonary tuberculosis.**

| Disease process   | Biomarker               | Unit       | All PTB<br>(n=97)      | HO-1 <sup>hi</sup> MMP-1 <sup>lo</sup><br>(n=39) | HO-1 <sup>lo</sup> MMP-1 <sup>hi</sup><br>(n=39) | P-value          |
|-------------------|-------------------------|------------|------------------------|--------------------------------------------------|--------------------------------------------------|------------------|
| Inflammation      | $\alpha$ 2macroglobulin | ng/mL      | 2.7<br>(1.2-5.3)       | 2.1<br>(0.9-5.2)                                 | 3.4<br>(2.0-6.3)                                 | 0.077            |
|                   | CRP                     | mg/L       | 36.3<br>(21.2-69.4)    | 70.0<br>(58.5-75.8)                              | 23.0<br>(20.4-41.1)                              | <b>&lt;0.001</b> |
|                   | Ferritin-H              | ng/mL      | 234.8<br>(93.9-414.2)  | 245.2<br>(65.2-348.6)                            | 181.5<br>(87.0-415.6)                            | 0.497            |
|                   | Haptoglobin             | $\mu$ g/mL | 1.3<br>(0.2-6.4)       | 3.4<br>(1.6-5.2)                                 | 1.5<br>(0.3-7.8)                                 | <b>&lt;0.001</b> |
|                   | Heme                    | $\mu$ M    | 21.7<br>(15.5-31.0)    | 20.9<br>(16.9-29.7)                              | 21.4<br>(14.4-27.8)                              | 0.704            |
|                   | IFN- $\gamma$           | pg/mL      | 33.9<br>(29.8-38.1)    | 36.0<br>(31.8-80.3)                              | 29.8<br>(27.8-36.0)                              | <b>&lt;0.001</b> |
|                   | IL-10                   | pg/mL      | 21.1<br>(15.9-29.0)    | 28.3<br>(24.3-37.2)                              | 17.0<br>(12.1-19.4)                              | <b>&lt;0.001</b> |
|                   | IL-17                   | pg/mL      | 27.1<br>(22.9-35.3)    | 27.7<br>(23.6-38.7)                              | 26.5<br>(22.1-31.2)                              | 0.274            |
|                   | SAA                     | pg/mL      | 125.1<br>(94.6-231.3)  | 101.7<br>(76.2-137.9)                            | 225.9<br>(119.1-517.9)                           | <b>&lt;0.001</b> |
|                   | TNF- $\alpha$           | pg/mL      | 21.3<br>(15.0-27.4)    | 15.8<br>(12.8-24.0)                              | 22.6<br>(18.3-28.2)                              | <b>0.015</b>     |
| Tissue remodeling | MMP-8                   | ng/mL      | 122.4<br>(54.1-202.3)  | 46.6<br>(24.3-76.9)                              | 190.4<br>(152.2-272.8)                           | <b>&lt;0.001</b> |
|                   | MMP-9                   | ng/mL      | 384.2<br>(255.0-510.8) | 275.3<br>(116.1-533.3)                           | 441.5<br>(352.2-429.9)                           | <b>0.012</b>     |
|                   | TIMP-1                  | ng/mL      | 180.0<br>(161.7-199.7) | 189.0<br>(177.2-201.4)                           | 171.3<br>(157.3-198.6)                           | <b>0.028</b>     |
|                   | TIMP-2                  | ng/mL      | 219.0<br>(199.4-239.0) | 223.5<br>(203.3-238.0)                           | 216.5<br>(194.3-241.0)                           | 0.689            |
|                   | TIMP-3                  | ng/mL      | 26.3<br>(15.9-43.9)    | 29.8<br>(11.1-54.6)                              | 25.1<br>(17.3-39.1)                              | 0.868            |
|                   | TIMP-4                  | ng/mL      | 10.3<br>(7.7-12.4)     | 10.5<br>(8.5-12.3)                               | 10.0<br>(7.5-12.4)                               | 0.576            |

Data represent medians and interquartile ranges. The values of each biomarker were compared between patients with simultaneously high concentrations of HO-1 and low levels of MMP-1 (HO-1<sup>hi</sup>MMP-1<sup>lo</sup>) and those with low levels of HO-1 and high MMP-1 values in plasma (HO-1<sup>lo</sup>MMP-1<sup>hi</sup>) using the Mann-Whitney test. Statistically significant P values are highlighted in bold font.
